# Supplementary material for: Administration of Hypoxia-Activated Prodrug Evofosfamide after Conventional Adjuvant Therapy Enhances Therapeutic Outcome and Targets Cancer-Initiating Cells in Preclinical Models of Colorectal Cancer
Source: Oxford University Press journal article supplement (doi:10.1158/1078-0432.ccr-17-1715), 2018-02-23
Supplement: 10780432ccr171715-sup-184916_2_supp_4531257_p36bl8.xlsx [file 10780432ccr171715-sup-184916_2_supp_4531257_p36bl8.xlsx]

## Sheet: Table S1
Supplementary Table S1. Summary of colorectal cancer patient samples used in this study. The tissue site from which samples originated or were collected, disease stage, and main driver mutations are listed.
Sample name	Disease site	Sample site	Tissue type	Stage	Mutations
POP66	Colon	Liver	Metastatic	IV	BRAF, TP53
POP74	Colon	Cecum	Primary	III	APC, KRAS, TP53
POP92	Colon	Sigmoid colon	Primary	IV	APC, BRAF, TP53
POP181	Colon	Lung	Metastatic	IV	APC, NRAS
CSC91	Rectum	Abdominal wall	Metastatic	IV	KRAS
CSC134	Colon	Sigmoid colon	Primary	III	unknown
